# Supplementary material for: Prevalence and determinants of erectile dysfunction among diabetic patients attending in hospitals of central and northwestern zone of Tigray, northern Ethiopia: a cross-sectional study
Source: Springer Nature journal article supplement (doi:10.1186/s12902-017-0167-5), 2017-03-15
Supplement: MOESM1 [file 12145372]

*Aksum University*

*College of Health Sciences*

This questionnaire is designed to determine Prevalence and Determinants of Erectile Dysfunction among Diabetic Patients attending in Hospitals of Central and Northwestern Zone of Tigray, Northern Ethiopia.

**Direction for Data Collectors:** please circle the patients' response from the given options.

**1. Socio-demographic characteristics**

- 1.1. **Age** (year) \_\_\_\_\_
- 1.2. **Ethnicity** 1. Tigray 2. Other(s) \_\_\_\_\_
- 1.3. **Marital Status**
  1. Single 2. Married 3. Separated
  4. Divorced 5. Widowed
- 1.4. **Religion**
  1. Orthodox
  2. Muslim 3. Protestant 4. Other (s) \_\_\_\_\_
- 1.5. **Educational Status**
  1. Illiterate
  2. Primary (Grade 1-8)
  3. Secondary (Grade 9-12)
  4. College/university
- 1.6. **Occupational Status**
  1. Farmer 4. Merchant
  2. Gov't employee 5. Daily Laborer
  3. NGO employee 6. House wife 7. Other(s) \_\_\_\_\_
- 1.7. **Monthly Income (ETB)**
  1.  $\leq 500$  2. 501-1000 3.  $\geq 1001$

## **II. Life Style Habits**

1. Do you drink alcohol?                      1.1. No                                      1.2. Yes  
    If yes            Type \_\_\_\_\_  
                          Amount \_\_\_\_\_
2. Do you smoke cigarettes?            1.1. No                                      1.2. Yes  
    If yes! Number of packets per day \_\_\_\_\_
3. Do you exercise regularly?            1.1. No                                      1.2. Yes
4. BMI of the patient  
    Height (meter) \_\_\_\_\_  
    Weight (K.g) \_\_\_\_\_ BMI \_\_\_\_\_ K.g/m<sup>2</sup>
5. Blood Pressure of the patient \_\_\_\_\_ mmHg.
6. Current Fasting Blood Sugar (FBS) of the patient \_\_\_\_\_ mg/dl

## **III. Medical Characteristics**

1. Do you have chronic diseases other than DM?            1.1. No                                      1. 2. Yes
2. If yes to Q.1 what is (are)
  - 2.1. Hypertension
  - 2.2. Congestive Heart Failure
  - 2.3. Chronic Kidney Disease
  - 2.4. Chronic Liver Disease
  - 2.5. Rheumatoid Arthritis
  - 2.6. Tuberculosis
  - 2.7. Other (specify) \_\_\_\_\_
3. How long you have been diagnosed with DM? \_\_\_\_\_ Months/years.
4. Which type DM you have?            4.1. Type 1                                      4. 2. Type 2
5. Do you take any drugs other than for DM? 1.1. No                                      1.2. Yes (specify) \_\_\_\_\_

#### IV. The IIEF-5 Questionnaire

| S. No | Over The Past Six Months:                                                                                                     |                          |                                                 |                                      |                                                |                           |
|-------|-------------------------------------------------------------------------------------------------------------------------------|--------------------------|-------------------------------------------------|--------------------------------------|------------------------------------------------|---------------------------|
| 1     | How do you rate your Confidence that you could get and keep an erection?                                                      | Very low<br>1            | Low<br>2                                        | Moderate<br>3                        | High Very<br>4                                 | High<br>5                 |
| 2     | When you had erections with Sexual stimulation, how often were your erections hard enough for penetration?                    | Almost never/never<br>1  | A few times (much less than half the time)<br>2 | Sometimes (about half the time)<br>3 | Most times (much more than half the time)<br>4 | Almost always/always<br>5 |
| 3     | During sexual intercourse, how often were you able to maintain your erection after you had penetrated (entered) your partner? | Almost never/never<br>1  | A few times (much less than half the time)<br>2 | Sometimes (about half the time)<br>3 | Most time (much more than half the time)<br>4  | Almost always/always<br>5 |
| 4     | During sexual intercourse, how difficult was it to maintain your erection to completion of intercourse?                       | Extremely difficult<br>1 | Very difficult<br>2                             | Difficult<br>3                       | Slightly difficult<br>4                        | Not difficult<br>5        |
| 5     | When you attempted sexual intercourse, how often was it satisfactory for you?                                                 | Almost never/never<br>1  | A few times (much less than half the time)<br>2 | Sometimes (about half the time)<br>3 | Most times (much more than half the time)<br>4 | Almost always/always<br>5 |
